# Supplementary material
Source: publisher figshare collection journal article supplement (https://sage.figshare.com/ndownloader/files/30778892)
Supplement: Supplementary file 1 [file 30778892]

**Table S1.** Morphology of starch granules

| ID | Granule shape | Size range in μm | Hilum | Fissures | Lamellae | Extinction Cross |
| --- | --- | --- | --- | --- | --- | --- |
| Acorn Type 1  (*Quercus* sp./*Castanopsis* sp./*Cyclobalanopsis* sp.) | Triangular or water-drop shaped | 9.3-33.44 | centric or eccentric | linear | rare | mostly with bent arms, sometimes straight |
| Acorn Type 2  (*Lithocarpus* sp./*Cyclobalanopsis* sp./*Castanopsis* sp.) | Spherical, many with facets | 5.2-38.3 | centric | linear | visible on large  grains | mostly straight |
| Kudzu vine root  (*Pueraria* sp.) | round polyhedral with two or more flat facets, some spherical or bell-shaped | 4.43-25.93 | centric or eccentric | rare | absent | arms with increasing thickness away from the center |
| Snake gourd root (*Trichosanthes kirilowii*) | spherical or regular oval, bell-shape, semi-spherical, and nearly semi-spherical with facets | 7.14-29.75 | centric or eccentric | some with short linear fissure | visible on large grains | Mostly with bent arms, sometimes straight |
| Lily  (*Lilium* sp.) | irregular triangular | 12.6-67.44 | eccentric | some with short linear fissure | visible on most grains | bent arms |
| Yam  (*Dioscorea* sp.) | irregular triangular or oval shape | 12.34-23.11 | eccentric | some with short linear fissure | visible on most grains | bent arms |
| Fern root  (*Pteridaceae* sp.) | Round or irregular | 14.1-34.93 | centric or eccentric | absent | visible | wavy arms |
| Lotus root (*Nelumbo nucifera*) | elongate oval | 33.94-44.98 | eccentric | short linear | Visible, some showing wrinkles on the surface | bent arms |
| cf. Ginger (*Zingiber* sp.) | Elongate oval or fan-shaped | 12.54 -33.32 | extremely eccentric; a relief is visible under the DIC view | absent | absent | bent arms |
| Rice (Oryzeae) | polyhedral or round polyhedral; often appear as compound granules | 2.18-10.67 | centric | absent | absent | “x” shape |
| Job’s tears (*Coix lacryma-jobi*) | polygonal and sub-round, facetted | 10.71 – 22.7 | centric or  eccentric | common, “Y”, “V”, and linear forms, or many fine lines radiating to the edge | visible on some | mostly straight, sometimes with bent or Z-shaped arms |
| Barnyard grass (*Echinochloa* sp.) | Spherical or polyhedral | 8.04 – 11.97 | centric | absent | invisible | straight arms with increasing thickness |
| Bean (Phaseoleae) | irregularly oval or nearly kidney-shaped | 29.67-31.72 | centric | radiated | visible | multiple arms |
| Unidentified Underground Storage Organs (UNID USOs) | round or elongate oval | NA | eccentric | NA | NA | bent arms |
